# Supplementary material for: Japan’s development cooperation for health in Vietnam: A first holistic assessment on Japan’s ODA and non-ODA public resources cooperation
Source: Research Square preprint supplement (doi:10.21203/rs.3.rs-136809/v1), 2020-12-31
Supplement: Supplementary file 1 [file e5e1f7dd068b780777b3d8db.xlsx]

## Sheet: Sheet1
Additional table 2: Proportion of projects by WHO six building blocks and level of health administration, 2016
	Health Service Delivery		Health Workforce		Health Information System		Medical Products, Vaccines and Technologies		Health Systems Financing		Leadership and Governance
Level of Health Administration	USD	%	USD	%	USD	%	USD	%	USD	%	USD	%
Central Level	2.09561e+07	24.5	1.00156e+06	1.2	20784381	24.3	1.9954e+07	23.4	884471	1	312010	0.4
Provincial Level	8106417	9.5	387502	0.5	1.04537e+06	1.2	7.76125e+06	9.1	884471	1	63831.7	0.1
Local Level	689716	0.8	172346	0.2	63831.7		37533.1	0			63831.7	0.1
						0.1			0	0
Others	291839	0.3	108003	0.1	183835	0.2	1.63613e+06	1.9	0	0	0	0
Total	3.0044e+07	35.2	1.66942e+06	2	2.20774e+07	25.9	2.9389e+07	34.4	1.76894e+06	2.1	439673	0.5
Abbreviations: USD: US Dollars; %: Percentage out of total contribution among identified projects.
Note: In this table, one project may have multiple labeling of building blocks to reflect a more comprehensive understanding of the distribution of project focus areas.
